1  
2  
3  
4  
5  
6  
7  
8  
9  
10  
11  
12  
13  
14  
15  
16  
17  
18  
19  
20  
21  
22  
23  
24  
25  
26

## Autocatalytic chemical networks preceded proteins and RNA in evolution

Joana C. Xavier<sup>1,\*</sup>, Wim Hordijk<sup>2</sup>, Stuart Kauffman<sup>3</sup>, Mike Steel<sup>4</sup>, William F. Martin<sup>1,5</sup>

<sup>1</sup>Institut für Molekulare Evolution, Heinrich Heine Universität, 40225 Düsseldorf, Germany

<sup>2</sup>Konrad Lorenz Institute for Evolution and Cognition Research, 3400 Klosterneuburg,

Austria

<sup>3</sup>Institute for Systems Biology, WA 98109-5263, USA

<sup>4</sup>Biomathematics Research Centre, University of Canterbury, Christchurch 8041, New

Zealand

<sup>5</sup>Instituto de Tecnologia Química e Biológica, Universidade Nova de Lisboa, 2780-157

Oeiras, Portugal

\*Correspondence: [xavier@hhu.de](mailto:xavier@hhu.de)

## 27 **Abstract**

28 Modern cells embody metabolic networks containing thousands of elements and form  
29 autocatalytic molecule sets that produce copies of themselves. How the first self-sustaining  
30 metabolic networks arose at life's origin is a major open question. Autocatalytic molecule sets  
31 smaller than metabolic networks were proposed as transitory intermediates at the origin of  
32 life, but evidence for their role in prebiotic evolution is lacking. Here we identify reflexively  
33 autocatalytic food-generated networks (RAFTs)—self-sustaining networks that collectively  
34 catalyze all their reactions—embedded within microbial metabolism. RAFTs in the metabolism  
35 of ancient anaerobic autotrophs that live from H<sub>2</sub> and CO<sub>2</sub> generate amino acids and bases, the  
36 monomeric components of protein and RNA, and acetyl-CoA, but amino acids and bases do  
37 not generate metabolic RAFTs, indicating that small-molecule catalysis preceded polymers in  
38 biochemical evolution. RAFTs uncover intermediate stages in the origin of metabolic networks,  
39 narrowing the gaps between early-Earth chemistry and life.

40

41 **Keywords:** autocatalysis, autocatalytic networks, metabolism, origin of life, archaea,  
42 bacteria, methanogens, acetogens, LUCA

43

## 44 **Introduction**

45 Cells are autocatalytic in that they require themselves for emergence. The origin of the first  
46 cells from the elements on the early Earth roughly 4 billion years ago (Baross, 2018; Betts et  
47 al., 2018; Varma et al., 2018; Tashiro et al., 2017) must have been stepwise. The nature of  
48 autocatalytic systems as intermediate states in that process is of interest. Autocatalytic  
49 molecule sets are simpler than cellular metabolism and produce copies of themselves if  
50 growth substrates for food and a source of chemical energy for thermodynamic thrust are  
51 provided (Fuchs, 2011; Goldford et al., 2017; Semenov et al., 2016). In theory, sets of organic

52 molecules should be able to form autocatalytic systems (Dyson, 1982; Eigen and Schuster,  
53 1977; Kauffman, 1971), which, if provided with a supply of starting 'food' molecules, can  
54 emerge spontaneously and proliferate via constraints imposed by substrates, catalysts, or  
55 thermodynamics (Kauffman, 1986). Autocatalytic sets have attracted considerable interest as  
56 transitory intermediates between chemical systems and genetically encoded proteins at the  
57 origin of life (Hordijk et al., 2010; Kauffman, 1986; Smith and Morowitz, 2004; Sousa et al.,  
58 2015), but they have not been identified in non-enzymatic metabolic networks so far and  
59 evidence for their existence during prebiotic evolution is lacking.

60

61 Of special interest for metabolic evolution are a class of mathematical objects called  
62 Reflexively Autocatalytic Food-generated networks—RAFTs—in which each reaction is  
63 catalyzed by a molecule from within the network and all molecules can be produced from a  
64 set of food molecules by the network itself (Hordijk and Steel, 2004). Small chemical systems  
65 resembling RAFTs have been constructed in the laboratory (Ashkenasy et al., 2004; Semenov  
66 et al., 2016; Vaidya et al., 2012), although still far from the scale of cellular metabolism,  
67 which is composed of thousands of reactions. Modern cellular metabolism is enzyme-based,  
68 but >60% of enzyme mechanisms described to date involve one or more cofactors (Ribeiro et  
69 al., 2018) and 40% of all proteins crystallized have a bound metal relevant to their function  
70 (Guengerich, 2016). RAFTs can thus be identified in modern metabolism (Sousa et al., 2015)  
71 by attributing the catalysis of enzymes to their metals and cofactors in prebiotic evolution  
72 (Argueta et al., 2015; Martin and Russel, 2007; Stockbridge et al., 2010; Varma et al., 2018;  
73 White, 1976; Zabinski and Toney, 2001). If autocatalytic chemical networks antedate  
74 genetically encoded proteins, cofactor-dependent RAFTs might have been involved and, if so,  
75 should have left evidence for their existence in modern metabolic networks.

76

77 In search of RAFs, we investigated different levels of ancient metabolism preserved in  
78 modern cells. Starting with the biosphere level of the KEGG database, we first removed all  
79 eukaryote-specific reactions, and then peeled back one more layer of time by examining  
80 anaerobic metabolism. The detection of a large RAF in anaerobic prokaryotic metabolism  
81 prompted us to ask whether RAFs are also preserved in the metabolism of ancient anaerobic  
82 autotrophs that trace to the last universal common ancestor, LUCA (Weiss et al., 2016). As  
83 far back as we could look in metabolic evolution, RAFs were found. They were found in the  
84 metabolism of the acetogenic bacterium *Moorella thermoacetica* and the methanogenic  
85 archaeon *Methanococcus maripaludis*, primitive lineages that live on the simplest source of  
86 carbon and energy known, the H<sub>2</sub>-CO<sub>2</sub> redox couple (Baross, 2018; Fuchs, 2011; Martin and  
87 Russel, 2007; McCollom and Seewald, 2007; Müller et al., 2018; Weiss et al., 2016). Their  
88 RAFs furthermore intersect in a primordial network that generates amino acids, nucleosides,  
89 and acetyl-CoA from a starting set of simple food molecules, shedding light on the nature of  
90 autocatalytic networks that existed before the first cells arose from the elements on the early  
91 Earth.

92

93

## 94 **Results**

### 95 **Two-thirds of global prokaryotic metabolism can be annotated with small-molecule** 96 **catalysis**

97 In search of RAFs in 4-billion-year-old metabolism, we started from all 10,828 KEGG  
98 reactions and purged the set of non-primordial reactions in two pruning steps. First, we  
99 removed reactions assigned only to eukaryotes. Such reactions are not primordial because  
100 eukaryotes arose less than 2 billion years ago (Betts et al., 2018). Second, we excluded O<sub>2</sub>-  
101 dependent reactions, because O<sub>2</sub> is a product of cyanobacterial photosynthesis, which arose

102 about 2.4 billion years ago (Fischer et al 2016). These pruning steps left 5847 enzyme-  
103 associated reactions, 66% of which involve at least one cofactor. The addition of 147  
104 spontaneous reactions generated a global network comprising 5994 reactions and 5723  
105 metabolites (see Materials and Methods, **Figure S1 and Table S1A**). The cofactors involved  
106 in this ancient anaerobic network are distributed among the five different Enzyme  
107 Commission (E.C.) classes as shown in **Figure 1**. Metal catalysis is widespread across all  
108 classes of metabolism, and NADH dominates the oxido-reductase reactions. The network  
109 comprises 70% of the initial enzymatic reaction network before removal of O<sub>2</sub>-dependent and  
110 eukaryote-specific reactions, indicating that most metabolism was invented in the anaerobic  
111 world (Raymond and Segrè, 2006).

112

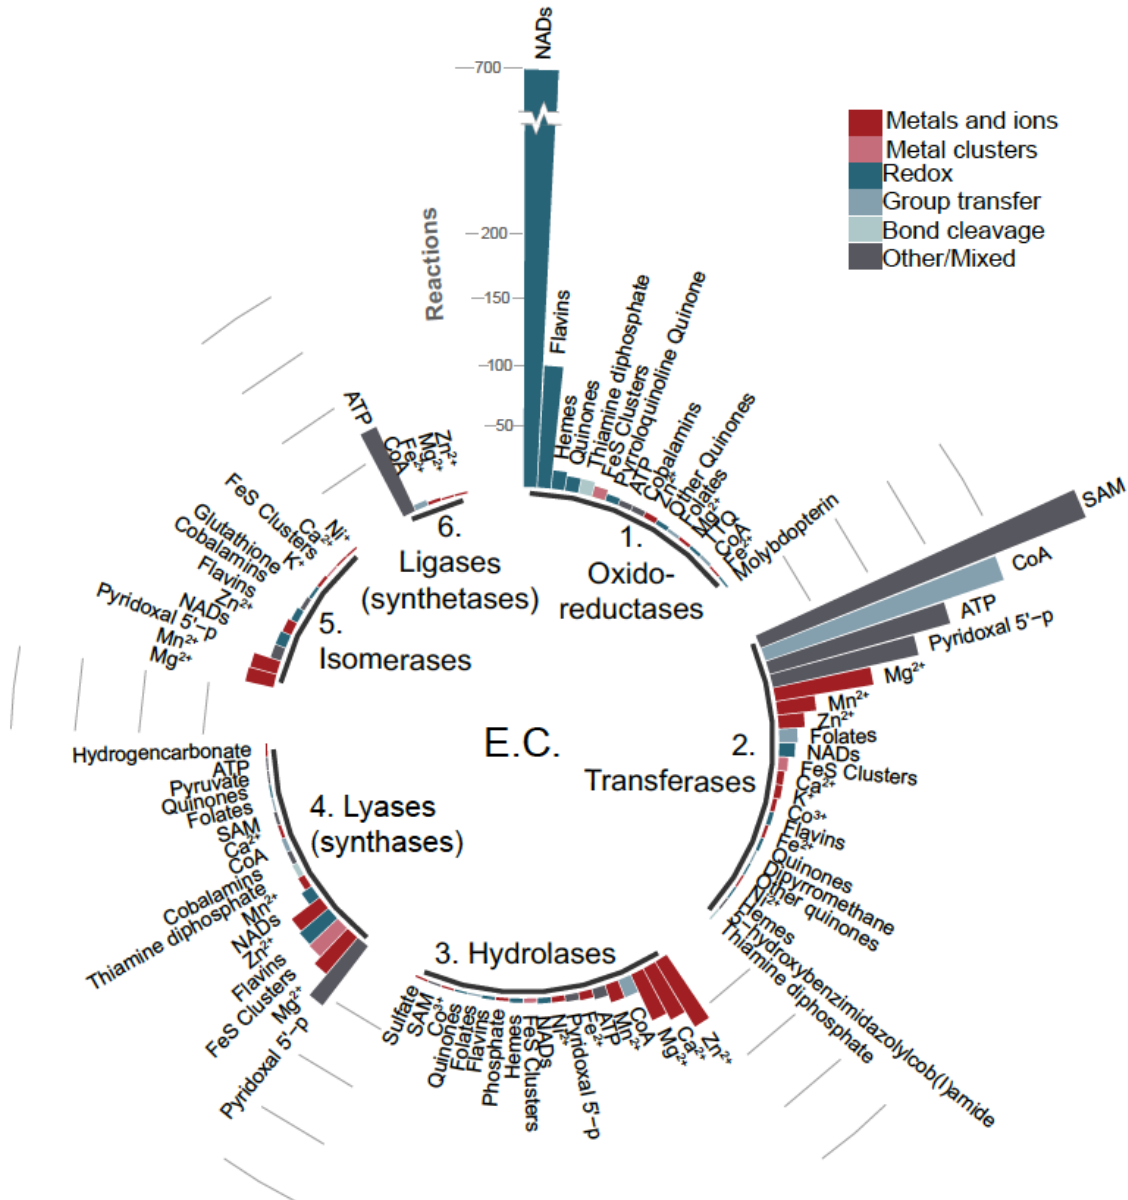

113

114

**Figure 1. Catalysts in global oxygen-independent prokaryotic metabolism.**

115

The catalysis-annotated network separated by Enzyme Commission (EC) classes with the

116

corresponding cofactors for each. Cofactors are grouped (legend, top-right) according to their

117

function in catalysis.

118

119

120

121

**Autocatalysis in global metabolism expands with a small set of cofactors**

122 The largest possible RAFs (maxRAFs) in a network are of interest because they represent its  
123 largest component of autocatalytic complexity. **Figure 2A** shows a schematic representation  
124 of a RAF within a metabolic network. The maxRAFs in the global prokaryotic O<sub>2</sub>-  
125 independent network were identified for different food sets, that is, molecules provided by the  
126 environment (**Table S2**). An inorganic food set containing H<sub>2</sub>O, H<sub>2</sub>, H<sup>+</sup>, CO<sub>2</sub>, CO, PO<sub>4</sub><sup>3-</sup>,  
127 SO<sub>4</sub><sup>2-</sup>, HCO<sub>3</sub><sup>-</sup>, P<sub>2</sub>O<sub>7</sub><sup>4-</sup>, S, H<sub>2</sub>S, NH<sub>3</sub>, N<sub>2</sub>, all metals, FeS clusters and other metal clusters, a  
128 generalist acceptor, donor, and metal produced a minute maxRAF with eight reactions linking  
129 ammonia, carbon, and sulfide transformations. The addition of formate, methanol, acetate,  
130 and pyruvate, which are central metabolites with experimental evidence for synthesis from  
131 CO<sub>2</sub> and metals (Varma et al., 2018), doubles the maxRAF size to 16 reactions. In principle,  
132 the addition of organic cofactors (**Table S2**) to the food set should generate larger maxRAFs.  
133 Sequential addition of the eight most frequent cofactors identified in the last universal  
134 common ancestor's (LUCA's) proteins (Weiss et al., 2016) to the metal-CO<sub>2</sub> food set  
135 expanded the maxRAF from 16 to 914 reactions (**Figure 2B**). Addition of all cofactors  
136 germane to the anaerobic network generates a maxRAF with 1335 reactions spanning 25% of  
137 the starting anaerobic network. Sequential addition of the eight compounds that were most  
138 frequent in that maxRAF, to the metal-CO<sub>2</sub> food set, expands the maxRAF from 16 to 1066  
139 reactions, whereas sequential addition of the five compounds with the greatest impact (upon  
140 removal from the food set) on anaerobic maxRAF size followed by the three most frequent in  
141 the largest maxRAF yields a final maxRAF of 1248 reactions (**Figure 2B**). These results  
142 indicate that RAFs can grow in size through sequential incorporation of organic cofactors  
143 (**Figure 2B**). RAFs can thus provide structure, contingency, increasing complexity, and  
144 direction to interactions among molecule food sets, given a sustained geochemical source of  
145 carbon, energy, and electrons.

146

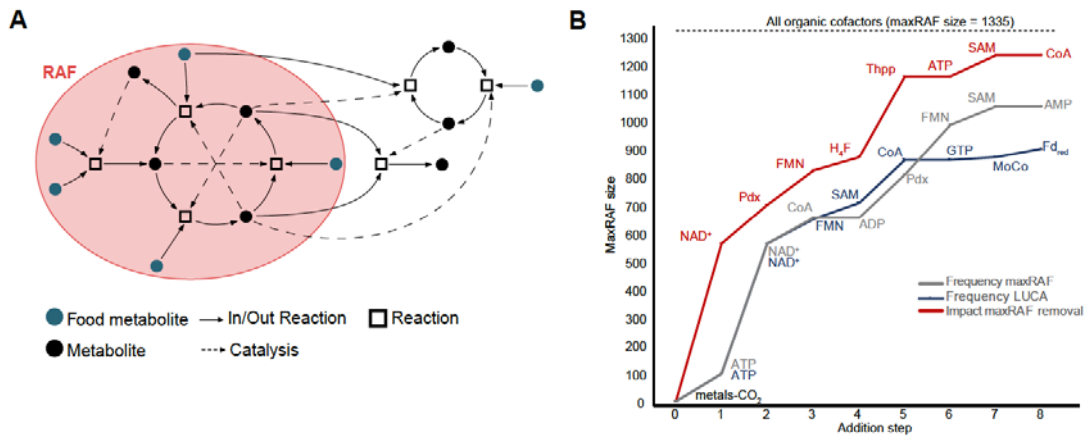

**Figure 2. Autocatalysis in global metabolism expands with a small set of cofactors.**

(A) Schematic depiction of a reflexively autocatalytic food-generated network (RAF)

highlighted (red ellipse) in a metabolic network. Food metabolites (green circles) may enter the RAF allowing subsequent reactions (squares) to occur and other metabolites (black

circles) to be produced. Each reaction is catalyzed by a metabolite in the network (catalysis

shown in dashed arrows). (B) Increasing maxRAF sizes with the sequential addition to the

food set of the organic cofactors (i) with the highest impact on maxRAF size upon removal

(red) (ii) most frequent in the maxRAF with all organic cofactors added (grey), and (iii) most

frequent in enzymes predicted to be in LUCA (Weiss et al., 2016) (blue) (Pdx – pyridoxal 5-

phosphate; H<sub>4</sub>F – tetrahydrofolate, Thi – thiamine diphosphate, MoCo – molybdopterin; Fd<sub>red</sub>

– reduced ferredoxin). Top dashed line shows the maxRAF size obtained when all organic

cofactors are added to the food set.

### Autocatalytic networks point to an early autotrophic metabolism

If autocatalytic sets were instrumental at the origin of metabolism (Kauffman, 1986), lineages with a physiology very similar to that of the first cells should harbor the most ancient RAFs.

Several lines of evidence indicate that methanogens and acetogens reflect the ancestral state

of microbial physiology: they live on the simplest source of carbon and energy known, the



167 H<sub>2</sub>-CO<sub>2</sub> redox couple (Baross, 2018; Fuchs, 2011; Martin and Russell, 2007; McCollom and  
168 Seewald, 2007; Müller et al., 2018; Weiss et al., 2016), they assimilate geochemically-  
169 generated carbon species (Stupperich and Fuchs 1984; Lang et al. 2010), they generate ATP  
170 from CO<sub>2</sub> fixation (Fuchs, 2011), their core bioenergetic reactions occur abiotically in  
171 hydrothermal vents (McCollom and Seewald, 2007; McDermott et al., 2015) and under  
172 laboratory conditions (Varma et al., 2018), their ecology and gene trees link them to LUCA  
173 (Weiss et al., 2016), and they still inhabit primordial habitats within the crust today (Ijiri et al.  
174 2018). Subsets of the global prokaryotic O<sub>2</sub>-independent network were obtained by parsing  
175 the genomes of the acetogen *Moorella thermoacetica* (Ace) and the methanogen  
176 *Methanococcus maripaludis* (Met). These were completed with reactions from corresponding  
177 manually curated genome-scale metabolic models (Islam et al., 2015; Richards et al., 2016),  
178 resulting in 1193 reactions for Ace and 920 for Met (**Tables S1B and S1C**). Both the  
179 acetogen and the methanogen metabolic networks contain RAFs. When all organic cofactors  
180 are added to the food set, the maxRAFs contain 394 and 209 reactions for Ace and Met,  
181 respectively, spanning major KEGG functional categories (**Figure 3; Tables S2 and S3,**  
182 **Figures S2 and S3**).

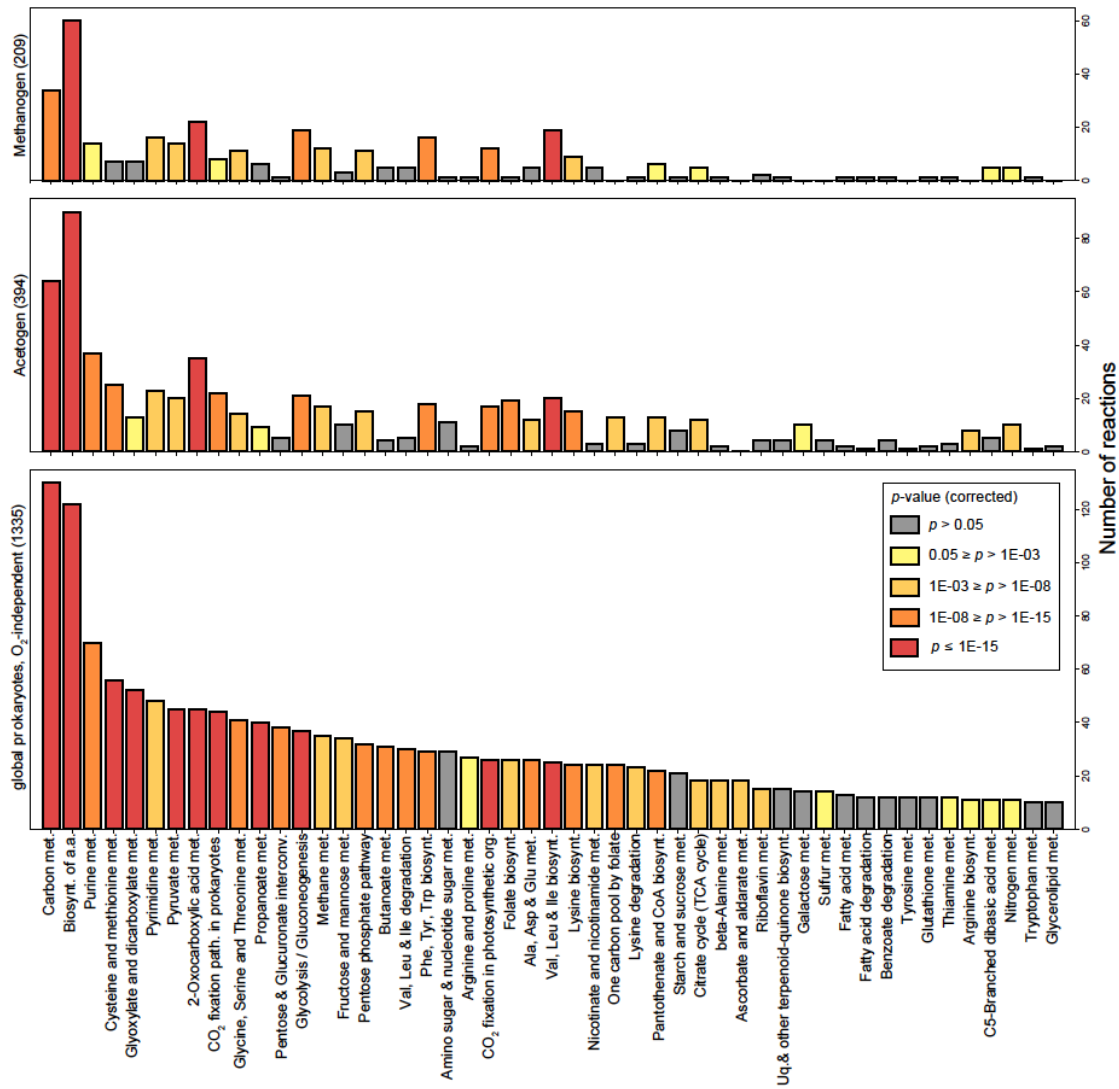

183

184 **Figure 3. Autocatalytic networks point to an early autotrophic metabolism.**

185 Number of reactions in each functional category for three maxRAFs and functional  
 186 enrichment compared with the global O<sub>2</sub>-independent prokaryotic network. Colors represents  
 187 bins of corrected  $p$ -values (Fisher's exact test with Benjamini–Hochberg FDR multiple-  
 188 testing correction). From bottom to top, maxRAF obtained for (sizes in brackets): global O<sub>2</sub>-  
 189 independent prokaryotic network, acetogen (Ace) and methanogen (Met). Categories are  
 190 sorted according to the number of reactions in the first maxRAF, from smallest to largest;  
 191 only categories where this maxRAF had more than 10 reactions are shown.

192

193

194 Carbon fixation and biosynthetic pathways are represented and amino acids biosynthesis is  
195 highly enriched in all maxRAFs, recovering autotrophic components of early autocatalytic  
196 metabolism. The addition of peptide catalysis increases the maxRAF sizes obtained with the  
197 global anaerobic network, Met, and Ace by 93%, 47%, and 25% respectively (**Table S2**).

198 This indicates that adding protein catalysis expands cofactor-supported autocatalytic sets, but  
199 does so to a much lesser degree in the metabolism of Met and Ace than it does in the global  
200 O<sub>2</sub>-independent prokaryotic network.

201

### 202 **LUCA's metabolism was autocatalytic and autotrophic**

203 The intersection of the Ace and Met maxRAFs should be more ancient than either. Three-  
204 quarters of the (smaller) Met maxRAF overlap with the (larger) Ace maxRAF in a connected  
205 network harboring 172 reactions and 175 metabolites (**Figures 4 and 5**; individual maxRAFs  
206 from Ace and Met in **Figures S2 and S3**). Six metabolites are disconnected, meaning the  
207 species interconvert them using different pathways; one example is that of glucose,  
208 catabolism of which arose after LUCA (Schönheit et al., 2016). Highly connected food  
209 metabolites in the primordial network (more than 13 edges) include H<sub>2</sub>O, ATP, protons,  
210 phosphate, CO<sub>2</sub>, NAD<sup>+</sup>, pyruvate, ammonia, diphosphate, coenzyme A and AMP; highly  
211 connected non-food metabolites (more than eight edges) include ADP, NADH, and other  
212 pyridine dinucleotides, glyceraldehyde-3-phosphate, and acetyl-CoA (**Table S4**). The  
213 network is able to produce six amino acids—asparagine, aspartate, alanine, glycine, cysteine,  
214 and threonine—plus the two nucleosides UTP and CTP. Cytochromes and quinones do not  
215 figure into the network.

216

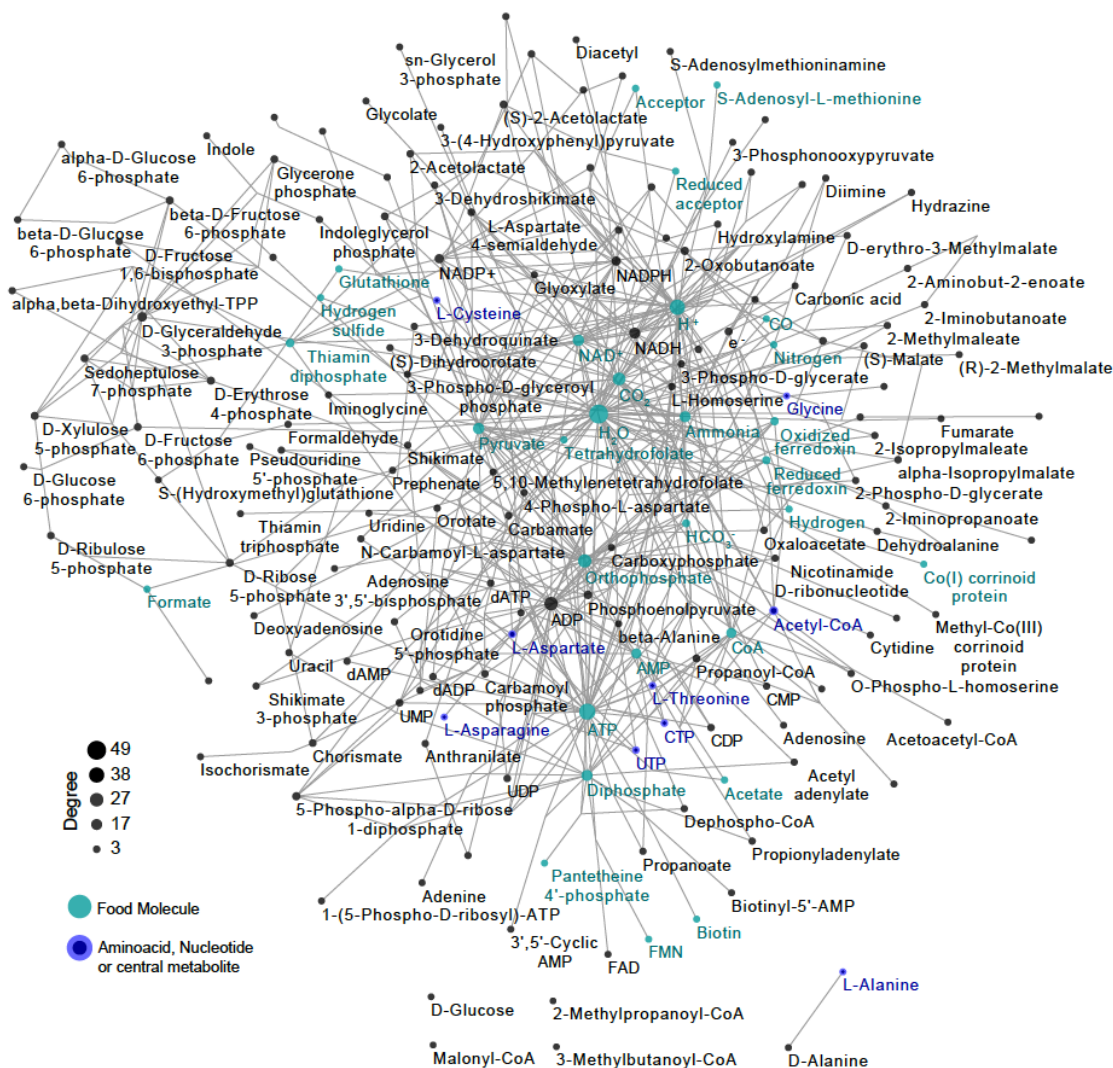

217 **Figure 4. Core autocatalytic metabolism of the last universal common ancestor (LUCA).**

218  
219 Intersection of the maxRAFs obtained with the networks of *Moorella thermoacetica* and

220 *Methanococcus maripaludis* with a food set with organic cofactors (only metabolic

221 interconversions are depicted; catalysis arcs are omitted for clarity). Six metabolites,

222 including D-glucose and L-alanine (bottom) are in the intersection but disconnected from the

223 remaining network. The node size is scaled according to the degree, with food molecules

224 highlighted in green and relevant products in dark blue. ‘Acceptor’ and ‘Reduced Acceptor’

225 are abstract redox molecules as represented in KEGG metabolism.

226

227 A different look at the primordial network reveals a hierarchical and highly-connected  
228 organization (**Figure 5**). The network is structured with a core half-moon, where the degree  
229 varies from 49 to 4 (**Table S4**). Food molecules cluster in the most connected area, showing  
230 the spark of autocatalytic metabolism by a handful of substrate molecules with degree higher  
231 than 10.

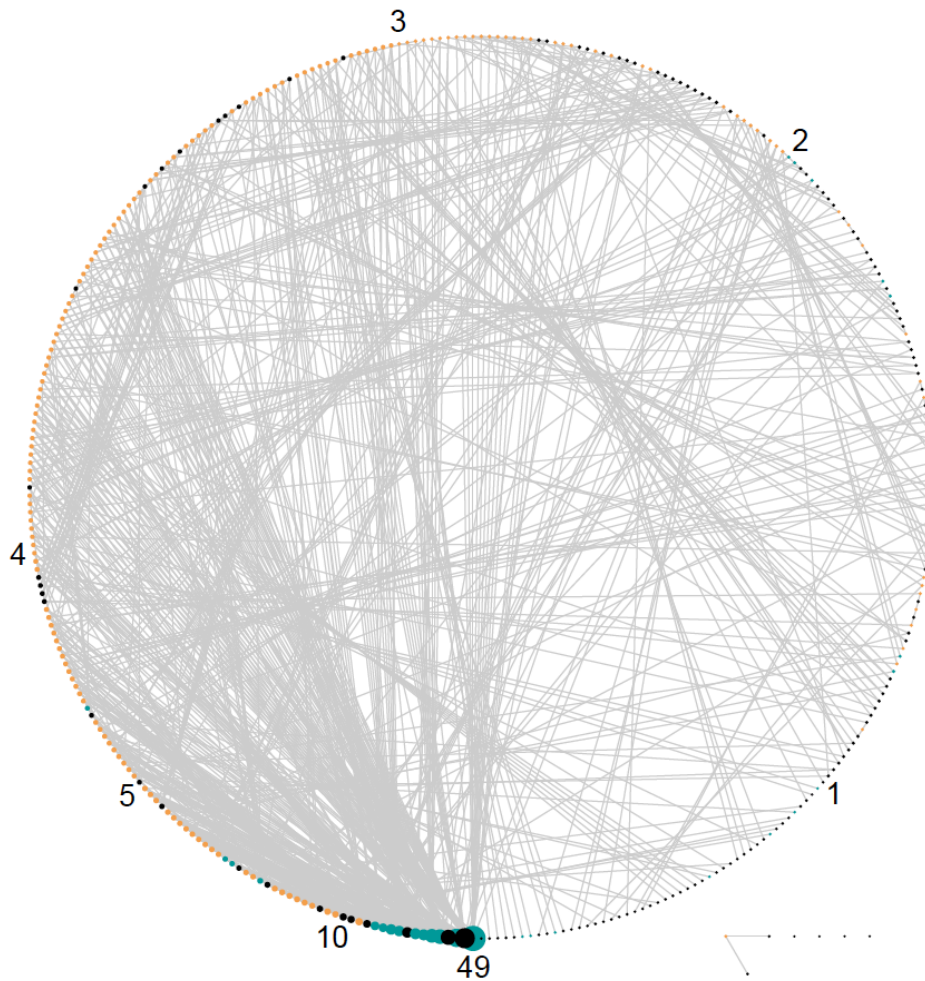

232

233 **Figure 5. Circular bipartite representation of the autocatalytic metabolism in LUCA.**

234 Reactions (in orange) and metabolites (in green if food, grey for the rest) are represented as  
235 nodes. Nodes are sorted according to degree clockwise starting from the bottom; numbers  
236 show the degree at the respective position. ATP, the second most connected metabolite, can  
237 be removed from the food set without impact, therefore here is represented in black.

238

239

240 **LUCA's metabolism is enriched in metal catalysis, ancient genes and autotrophic**  
241 **functions**

242 In search of the distinct contributions for autocatalysis, we tested for enrichment in individual  
243 catalysts, functions and ancient genes encoding for reactions in the primordial network. There  
244 is a significant enrichment for metal and metal–sulfur cluster catalysis (**Figure 6A**), whereas  
245 thiamine diphosphate (a carrier of C2 units in metabolism) is the only organic cofactor that is  
246 significantly enriched in catalyzing the primordial network when compared with the global  
247 network, even though several others are present and essential for the network to grow (**Figure**  
248 **6B**). The primordial network is also enriched in reactions for amino acid biosynthesis, carbon  
249 metabolism, and 2-oxocarboxylic acid metabolism when compared with the global network  
250 (**Figure 6B**). Comparing reactions in the primordial network to those catalyzed by genes that  
251 can be traced to LUCA by independent phylogenetic criteria (Weiss et al., 2016) uncovers  
252 highly significant enrichment relative to both the global network and its maxRAF (**Figure**  
253 **6C**). The maxRAF obtained within the primordial network contains 120 reactions and is  
254 enriched in amino acid and carbon metabolism but produces cysteine as the sole amino acid,  
255 which is noteworthy because cysteine is the hub of sulfur metabolism and also is the sole  
256 ligand for incorporating Fe–S and Fe–Ni–S clusters in proteins (**Figure S4**).

257



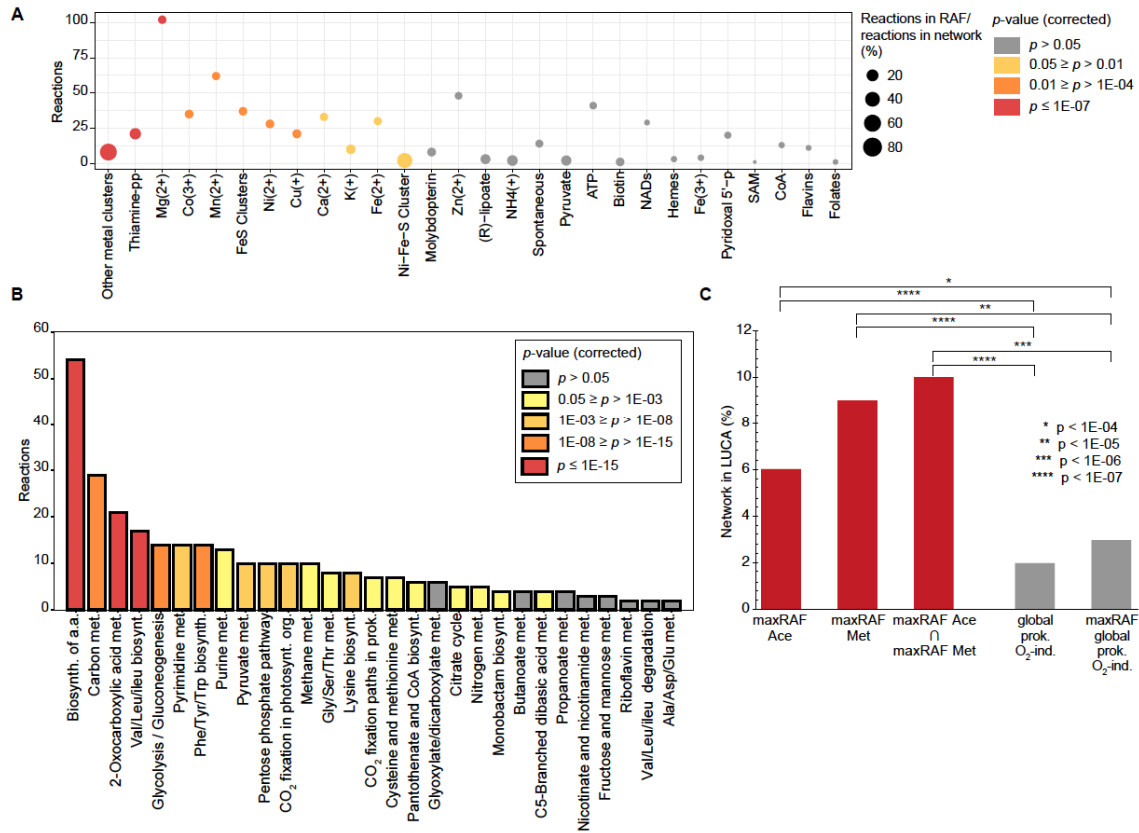

**Figure 6. Properties of the core autocatalytic metabolism of the last universal common ancestor (LUCA).**

(A) Enrichment of cofactors catalyzing the reactions in the overlapping network between the acetogen and methanogen maxRAFs compared with the global O<sub>2</sub>-independent prokaryotic network. Circle size indicates the ratio between reactions in the intersection network and reactions in the global network; color indicates the corrected  $p$ -value (Fisher's exact test with Benjamini–Hochberg FDR correction). (B) Enrichment of KEGG pathways in the overlapping network compared with the global O<sub>2</sub>-independent prokaryotic network. Color indicates bins of corrected  $p$ -values (Fisher's exact test with Benjamini–Hochberg FDR correction). (C) Proportion of metabolic networks predicted to be in LUCA (Weiss et al., 2016) and enrichment of the maxRAFs (red) compared with the global network and the maxRAF obtained with it (grey) (Fisher's exact test).

## 272 Autocatalysis before ATP and polymers

273 Crucial catalysts can be identified by removing them from the food set.  $\text{NAD}^+$  is strongly  
274 embedded in the RAF and its removal reduces the size of the maxRAF by ~50% (**Figure 7**).  
275 Other compounds heavily impacting maxRAF size are Fe–S clusters, pyridoxal-5-phosphate  
276 and divalent metals. Surprisingly, when we remove ATP from the food set of organic  
277 cofactors, this has no impact on the size of the maxRAF, both for the individual networks  
278 (**Figure 7**) and LUCA's network (**Figure 5**). Why does ATP removal have such a small effect  
279 on RAFs? The simplest explanation is that ATP was not the primordial energetic currency  
280 (Goldford et al., 2017). This points to the increasingly evident role of energy currencies other  
281 than ATP in primordial metabolism, such as acyl phosphates (Martin and Russell, 2007),  
282 thioesters (Semenov et al., 2016), and reduced ferredoxin (Herrmann et al., 2008, Müller et  
283 al., 2018). Alternative energy currencies are particularly common in anaerobes (Müller et al.,  
284 2018).

285

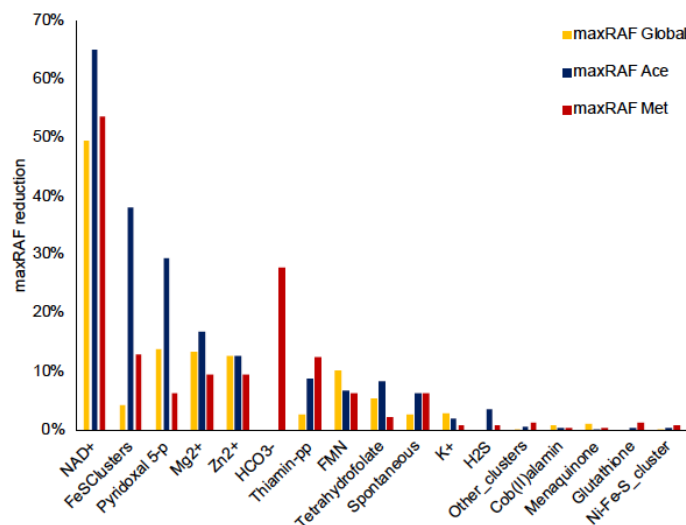

286

287 **Figure 7. Impact of removing single molecules from the food set with organic cofactors**  
288 **on the size of maxRAFs.**

289 The impact is shown as the reduction in size of the maxRAF (percentage of the initial network  
290 lost) when each molecule is removed from the food set with all organic cofactors, for the



291 global prokaryotic O<sub>2</sub>-independent network (yellow), *Moorella thermoacetica* (dark blue) and  
292 *Methanococcus maripaludis* (red).

293

294

295 RAFs provided with a food set containing catalysts can generate amino acids and bases  
296 (**Figure 4**), but the converse is not true: adding amino acids and bases to the simplest food set,  
297 which includes inorganic catalysts and CO<sub>2</sub> (**Table S2**), produces a miniscule 33-reaction  
298 maxRAF (**Figure S5**). The maxRAF contains 47 metabolites, 27 of which are food molecules.  
299 This indicates that autocatalytic networks embedded in microbial metabolism generated  
300 amino acids and bases using small-molecule catalysis prior to the advent of nucleic acids or  
301 peptide polymers.

302

## 303 **Discussion**

304 Autocatalytic networks are objects of molecular self-organization (Dyson, 1982; Eigen and  
305 Schuster, 1977; Kauffman, 1986). Their salient property in the study of early biochemical  
306 evolution is the capacity to grow in size and complexity. Compounds generated from the food  
307 set become part of the network, hence autocatalytic networks can start small and grow, in  
308 principle to a size approaching the complexity of metabolic networks of modern cells  
309 (Hordijk et al., 2010), and very little catalysis by individual elements is required for  
310 autocatalytic networks to emerge (Hordijk and Steel, 2004; Mossel and Steel, 2005).

311 Reflexively autocatalytic and food-generated networks—RAFs—are a particularly interesting  
312 formalization of collectively autocatalytic sets, as they capture a property germane to life:  
313 they require a constant supply of an environmentally provided food source in order to grow  
314 (Hordijk and Steel, 2004). In that sense, RAFs reflect metabolic networks in real cells, in that  
315 growth substrates are converted to end products, a proportion of which comprises the

316 substance of cells. But RAFs are far simpler than metabolism because they can start very  
317 small.

318

319 RAFs have not been applied in the study of the evolution of chemical networks that led to the  
320 metabolism of modern cells, themselves large natural autocatalytic networks. By embracing  
321 the simple and robust premise that reactions catalyzed by simple molecules and inorganic  
322 compounds preceded metabolic reactions catalyzed by enzymes (Sousa et al., 2015;  
323 Stockbridge et al., 2010; White, 1976), we have retooled RAFs into an analytical instrument  
324 to investigate the nature of metabolic evolution.

325

326 Our analyses start with the enzymatic and spontaneous reactions charted in modern  
327 metabolism and use RAFs as a filter to uncover elements with self-organizational properties,  
328 to address the nature of processes in the earliest phases of evolution, before the origin of  
329 eukaryotes and before the appearance of oxygen. We find evidence for a role of autocatalytic  
330 networks in the early evolution of metabolism. The largest RAF that we identified in the  
331 whole prokaryotic anaerobic biochemical space has 1335 reactions and points to early  
332 autotrophy. This RAF is larger than the genome size of the smallest free-living archaeon,  
333 *Methanothermobacter ferredoxigenes* (Martínez-Cano et al., 2015). With a genome coding for 1,311  
334 proteins and 50 RNA genes, *M. ferredoxigenes* lives from H<sub>2</sub> and CO<sub>2</sub> as carbon and energy sources  
335 (the food set) and requires only inorganic, geochemical nutrients, no other cells for survival  
336 (Anderson et al., 2010). H<sub>2</sub> and CO<sub>2</sub> were present in abundance on the early Earth and may  
337 have given rise to the first metabolic pathways that brought forth the first archaeal and  
338 bacteria cells (Goldford et al., 2017, Varma et al, 2018; Weiss et al., 2006). Our anaerobic  
339 RAF is however smaller than the reaction network in the smallest genome of bacteria that live  
340 from H<sub>2</sub> and CO<sub>2</sub>, which is found in the acetogen *Thermoanaerobacter kivui*, encoding 2,378  
341 proteins (Hess et al., 2014).

342

343 *M. fervidus* and *T. kivui* harbor primitive forms of methanogenesis and acetogenesis in that  
344 they both lack cytochromes and quinones, suggesting that they represent energy metabolic  
345 relics from the earliest phases of biochemical evolution on the primordial earth, before  
346 anaerobic respiratory chains had evolved (Martin and Russell, 2007). To investigate this  
347 aspect further, we examined the best annotated metabolic networks existing for H<sub>2</sub>-CO<sub>2</sub>  
348 dependent archaea and bacteria, the methanogen *Methanococcus maripaludis* and the  
349 acetogen *Moorella thermoacetica*. Remarkably, a food set containing only small abiogenic  
350 molecules and a handful of organic cofactors generates sizeable RAFs in each of the  
351 networks, with 209 and 394 reactions respectively. The inclusion of organic molecules as  
352 catalysts in our food set is in line with a premise common to all scientific theories for the  
353 origin of life, namely that the environment provided starting material from which metabolism  
354 and life evolved.

355

356 RAFs uncover elements of metabolic evolution that go even further back in time before the  
357 divergence of archaea and bacteria from the last universal common ancestor, LUCA. The  
358 intersection of the RAFs of *M. maripaludis* and *M. thermoacetica* uncovers a fair amount in  
359 common—a core, conserved autocatalytic network with 172 reactions that is enriched in  
360 metal catalysis and carbon metal bonds (Martin, 2019) and also points both to early  
361 autotrophy and to the genes of LUCA (Weiss et al., 2016). Our results also show that the  
362 kickstart of autocatalysis in anaerobic metabolism does not require ATP. This is in  
363 accordance with the use of alternative energetic currencies in anaerobic prokaryotes (Müller  
364 et al., 2018) and recent findings that suggest that complexity in early metabolic reaction  
365 systems could have emerged without phosphate (Goldford et al., 2017).

366

367 An important insight uncovered by RAFs is the observation that although a food set with  
368 organic cofactors sparks a large autocatalytic network that generates amino acids and bases,  
369 the opposite does not occur: adding amino acids and bases to the simplest food set (which  
370 includes inorganic catalysts and CO<sub>2</sub>) only produces a minute RAF with 33 reactions. This  
371 result indicates that autocatalytic networks could generate amino acids and bases using  
372 catalysts prior to the advent of complex nucleic acids or peptide polymers. This stands in  
373 accordance with recent reports of amino acid synthesis catalyzed by native metals  
374 (Muchowska et al., 2019), and also with the physiology of extant anaerobic autotrophs: amino  
375 acids and bases are sequestered end-products of H<sub>2</sub> and CO<sub>2</sub> dependent metabolism, they are  
376 polymerized to make the substance of cells.

377

378 RAFs as a tool to study metabolic evolution can serve as a guide for the identification and  
379 construction of larger, biologically relevant autocatalytic reaction networks. The synthesis of  
380 compounds characteristic of the metabolism of acetogens and methanogens, intermediates and  
381 end products of the acetyl-CoA pathway and of the incomplete citric acid cycle from CO<sub>2</sub>  
382 using only the catalysis of native metals (Muchowska et al., 2019), as well as the  
383 demonstrated catalytic power of organic cofactors without their enzymes including flavins  
384 (Argueta et al., 2015), pyridoxal 5'-phosphate (Zabinski and Toney, 2001), SAM (Barrows  
385 and Magee, 1982) and NAD (Betanzos-Lara et al., 2012) encourages the investigation of  
386 more complex autocatalytic networks in laboratory reactors.

387

388 Our results are directly relevant to two deeply divided schools of thought concerning the  
389 nature of chemical reactions at the origin of life: genetics first and metabolism first. The  
390 genetics first school, or RNA world, holds that the origin of RNA molecules marked the  
391 origin of life-like processes, and that RNA both self-replicated and possessed catalytic  
392 abilities that led to the emergence of biochemical reactions (Orgel, 2008; Patel et al., 2015).

393 In that view, the origin of the bases that drove that process forward is decoupled from  
394 biochemical processes that are germane to modern cellular metabolism. The metabolism-first  
395 school holds that spontaneous (exergonic) chemical reactions preceded reactions catalyzed by  
396 genetic material, and that those exergonic reactions continuously gave rise to substrate-  
397 product relationships (Martin and Russell, 2007; Morowitz et al., 2000). From such reactions,  
398 more complex interaction networks with autocatalytic properties arose (Kauffman, 2011;  
399 Smith and Morowitz, 2004), in which elements of the set intervened in reactions of the set,  
400 providing structure and direction to product accumulation. Our results show that in RAFs of  
401 anaerobic metabolism, nucleoside-related cofactors play a central role, albeit these have  
402 functional moieties that do not occur in RNA as it catalyzes protein synthesis. More  
403 importantly, our findings indicate that RNA could arise from metabolism, and the nature of  
404 the products accumulated in RAFs will include nucleic acids. In other words, RAFs applied to  
405 ancient autotrophic metabolism reveal a vector of autopoietic genesis that detects RNA  
406 emerging from metabolism rather than vice versa.

407

## 408 **Materials and Methods**

### 409 **Catalysis-annotated metabolic networks**

410 All the reactions and the EC numbers they are linked to were retrieved from KEGG (Kanehisa  
411 et al., 2017), along with their corresponding taxonomic annotations using the KEGG REST  
412 API (<https://www.kegg.jp/kegg/rest/keggapi.html>, accessed February 2018). The EC–reaction  
413 pairs were filtered by excluding reactions annotated only in eukaryotes. The corresponding  
414 chemical equations were then parsed to discard reactions involving molecular oxygen.  
415 Spontaneous reactions were parsed out of KEGG and added to the network with a fictional  
416 catalyst named “Spontaneous”. Reactions catalyzed by enzymes that are not spontaneous and  
417 the enzymes of which do not use any cofactors were assigned the catalyst “Peptide”.

418 Reactions that equate synonymous cofactors were added with the generic catalyst “Pooling”.

419 Extensive curation was performed regarding catalysis rules, reaction reversibility, and amino

420 acid production. The reversibility of reactions was parsed out of KGML files for KEGG

421 pathways and manually–curated. The resulting set of reactions was then integrated with

422 cofactor information from Uniprot (The Uniprot Consortium, 2018) through the

423 corresponding EC numbers. Eighty-one unique cofactors were retrieved from Uniprot, which

424 translated to 48 KEGG compounds or pools of catalytically equivalent cofactors linked to

425 KEGG reactions through the EC numbers. Cofactors directly participating in reactions

426 (NADs, ATP, SAM, CoA, Cobalamins, Folates, Flavins and Quinones) were extracted from

427 the reaction stoichiometry if not assigned as cofactors in Uniprot. Of all EC numbers searched

428 in Uniprot, 34% had at least one associated cofactor, 579 of which were EC numbers that

429 involved more than one cofactor when parsed in a Boolean manner. All rules were added to

430 the network as additional parameters. The subsets for Met and Ace were obtained by crossing

431 the genomic annotation of *Moorella thermoacetica* and *Methanococcus maripaludis* in KEGG

432 with the previously built network, and with the addition of missing reactions that were present

433 in corresponding manually–curated models (Islam et al., 2015, Richards et al., 2016). The

434 pipeline for the full procedure is shown in **Figure S1**.

435

### 436 **Detection of maxRAFs**

437 All networks described above were tested for whether they contained maxRAFs with different

438 food sets, which are described in the main text and available in **Table S2**. The fictional

439 catalysts “Spontaneous” and “Pooling” were added in all tests, allowing for spontaneous

440 reactions to always occur and synonymous cofactors to be equated. Pooling reactions that

441 were part of the maxRAF were not accounted for in maxRAF sizes.

442

443

444 **RAF sets**

445 We define a *chemical reaction system* (CRS) as a tuple  $Q = \{X, R, C, F\}$ , where:

- 446 •  $X = \{x_1, x_2, \dots, x_n\}$  is a set of molecule types.
- 447 •  $R = \{r_1, r_2, \dots, r_m\}$  is a set of reactions. A reaction  $r$  is an ordered pair  $r = (A, B)$  where  
448  $A, B \subset X$ . The (multi)set  $A = \{a_1, \dots, a_s\}$  indicates the reactants and the (multi)set  
449  $B = \{b_1, \dots, b_t\}$  indicates the products.
- 450 •  $C \subseteq X \times R$  is a set of catalysis assignments. A catalysis assignment is a pair  $(x, r)$  with  
451  $x \in X$  and  $r \in R$ , denoting that molecule type  $x$  can catalyse reaction  $r$ .
- 452 •  $F \subset X$  is a food set (i.e., molecule types that can be assumed to be available from the  
453 environment).

454 Given a CRS  $Q$ , a subset  $R'$  of  $R$ , and a subset  $X'$  of  $X$ , we define the *closure* of  $X'$  relative to  
455  $R'$ , denoted  $cl_{R'}(X')$ , to be the (unique) minimal subset  $W$  of  $X$  that contains  $X'$  and that  
456 satisfies the condition that, for each reaction  $r = (A, B)$  in  $R'$ ,

$$A \subseteq X' \cup W \Rightarrow B \subseteq W.$$

457 Informally,  $cl_{R'}(X')$  is  $X'$  together with all molecules that can be constructed from  $X'$  by the  
458 repeated application of reactions from  $R'$ .

459 Given a CRS  $Q = \{X, R, C, F\}$  and a subset  $R'$  of  $R$ ,  $R'$  is a *RAF set* if for each  $r = (A, B) \in$   
460  $R'$

- 461 1. (Reflexive Autocatalysis):  $\exists x \in cl_{R'}(F): (x, r) \in C$ , and  
462 2. (Food-generated):  $A \subseteq cl_{R'}(F)$ .

463 In other words, a subset of reactions  $R'$  is a RAF set if, for each of its reactions, at least one  
464 catalyst and all the reactants are in the closure of the food set relative to  $R'$  (Hordijk and Steel,  
465 2004).

466

467

468 **RAF algorithms**

469 Given a CRS  $Q = \{X, R, C, F\}$ , an efficient (polynomial-time) algorithm exists for deciding  
470 whether  $Q$  contains a RAF set or not. It is presented formally in Algorithm 1.

471

---

472 **Algorithm 1** RAF ( $X, R, C, F$ )

---

```
473    $R' = R$ 
474    $change = true$ 
475   while ( $change$ ) do
476      $change = false$ 
477     Compute  $cl_{R'}(F)$ 
478     for all ( $r = (A, B) \in R'$ ) do
479       if ( $\nexists x \in cl_{R'}(F) : (x, r) \in C \vee A \not\subseteq cl_{R'}(F)$ ) then
480          $R' = R' \setminus \{r\}$ 
481          $change = true$ 
482       end if
483     end for
484   end while
485   Return  $R'$ 
```

---

486

487 In plain words, starting with the full set of reactions  $R$ , the algorithm repeatedly calculates the  
488 closure of the food set relative to the current reaction set  $R'$  and then removes all reactions  
489 from  $R'$  that have none of their catalysts or not all of their reactants in this closure. This is  
490 repeated until no more reactions can be removed. If, upon termination of the algorithm,  $R'$  is  
491 non-empty, then  $R'$  is the unique *maximal* RAF set (maxRAF) contained in  $Q$  (i.e., a RAF that  
492 contains every other RAF in  $Q$  as a subset) (Hordijk and Steel, 2004). If  $R'$  is empty, then  $Q$   
493 does not contain a RAF set.

494 Computing the closure of the food set relative to the current reaction set  $R'$  is computationally  
495 the most expensive step in the RAF algorithm. It is presented formally in Algorithm 2. This  
496 closure computation algorithm, introduced in Hordijk and Steel (2004), is equivalent to the  
497 “network expansion” algorithm (Ebenhöh et al., 2004) used in Goldford et al. (2017).

498



---

499 **Algorithm 2** ComputeClosure ( $F, R'$ )

---

```
500    $W = F$ 
501    $change = true$ 
502   while ( $change$ ) do
503      $change = false$ 
504     for all ( $r = (A, B) \in R'$ ) do
505       if ( $A \subseteq W \wedge B \not\subseteq W$ ) then
506          $W = W \cup B$ 
507          $change = true$ 
508       end if
509     end for
510   end while
511   Return  $W$ 
```

---

512

513 A naive computational complexity analysis of the RAF algorithm gives a worst-case running  
514 time of  $O(|X||R|^3)$ . However, with some additional book-keeping (such as keeping track of  
515 all reactions that each molecule is involved in), this can be reduced. In fact, the average  
516 running time on a simple polymer-based model of CRSs turns out to be sub-quadratic  
517 (Hordijk and Steel, 2004).

518

### 519 **LUCA enrichment analysis**

520 The genetic families identified in Weiss et al. (2016) were mapped to KEGG orthologues, the  
521 corresponding EC numbers were retrieved and the reactions performed by these were listed  
522 and compared with the lists of reactions comprising the different networks, namely the global  
523  $O_2$ -independent prokaryotic network; the maxRAF obtained with this network; maxRAFs  
524 obtained with the Ace and Met subsets; and the intersection of these.

525

### 526 **Statistical Analysis**

527 Fisher's exact tests with Benjamini–Hochberg multiple test corrections were performed for  
528 pathway and cofactor enrichment analysis (Figures 3, 6A-B), and significance was considered  
529 for corrected  $p$ -values smaller than 0.05. A Fisher test was performed for enrichment in

530 LUCA genes (Figure 6C) and significance was considered for  $p$ -values smaller than 0.0001.

531 All statistical analysis were performed in Python ver. 3.6.6 with the package `scipy.stats`.

532 Network properties were calculated and visualizations were produced with Cytoscape

533 (Shannon, 2003) ver. 3.7.1.

534

### 535 **Software availability**

536 A custom-made implementation of the maxRAF algorithm was used for the analysis in this

537 paper and is available at <https://www.canterbury.ac.nz/engineering/schools/mathematics->

538 [statistics/research/bio/downloads/raf/](https://www.canterbury.ac.nz/engineering/schools/mathematics-statistics/research/bio/downloads/raf/). An example of an input file (global prokaryotic O<sub>2</sub>-

539 independent network, food set with all small molecules, abiotic carbon and organic cofactors)

540 is given in **Data S1**. A more general-purpose and interactive RAF analyzer can be found

541 online at <http://www.math.canterbury.ac.nz/bio/RAF/>, including several more examples and

542 explanations.

543

### 544 **Acknowledgements**

545 We thank Filipa L. Sousa and Martina Preiner for comments. This work was supported by

546 grants from the European Research Council (666053) and the Volkswagen Foundation (93

547 046) to WFM. WH thanks the Institute for Advanced Study, University of Amsterdam, The

548 Netherlands, for partial support in the form of a fellowship.

549

### 550 **Author contributions**

551 JCX collected and integrated data from databases, curated models, and literature. JCX, MS,

552 SK and WFM designed the project. WH and MS wrote the pseudocode and algorithm for

553 detection of maxRAFs and WH performed maxRAF identification. JCX and WFM wrote the

554 first manuscript draft. JCX, WH, SK, MS, and WFM contributed in data interpretation and  
555 writing the final manuscript.

556

## 557 **Supplementary Information Titles and Legends**

558 **Figure S1. Pipeline of reconstructing catalysis-annotated metabolic networks.** Steps in  
559 grey include metabolic data only, steps in brown include catalysis rules, and steps in greens  
560 represent the inclusion of curated data from metabolic models of *Moorella thermoacetica* and  
561 *Methanococcus maripaludis*.

562 **Figure S2. MaxRAF obtained with the network of *Moorella thermoacetica*.** Node size is  
563 scaled according to the degree, with food molecules highlighted in green and relevant  
564 products in dark blue (only metabolic interconversions are depicted; catalysis arcs are omitted  
565 for clarity). ‘Acceptor’ and ‘Reduced Acceptor’ are abstract redox molecules as represented  
566 in KEGG metabolism.

567 **Figure S3. MaxRAF obtained with the network of *Methanococcus maripaludis*.** Node size  
568 is scaled according to the degree, with food molecules highlighted in green and relevant  
569 products in dark blue (only metabolic interconversions are depicted; catalysis arcs are omitted  
570 for clarity). ‘Acceptor’ and ‘Reduced Acceptor’ are abstract redox molecules as represented  
571 in KEGG metabolism.

572 **Figure S4. MaxRAF obtained with the intersection of the networks of *Methanococcus***  
573 ***maripaludis* and *Moorella thermoacetica*.** Node size is scaled according to the degree, with  
574 food molecules highlighted in green and relevant products in dark blue (only metabolic  
575 interconversions are depicted; catalysis arcs are omitted for clarity). ‘Acceptor’ and ‘Reduced  
576 Acceptor’ are abstract redox molecules as represented in KEGG metabolism.

577 **Figure S5. MaxRAF obtained with amino acids and bases.** The network represents the  
578 maxRAF obtained with the full prokaryote O<sub>2</sub>-independent network with inorganic catalysts,

579 abiotic compounds, all amino acids and bases but no organic cofactors added to the food set  
580 (only metabolic interconversions are depicted; catalysis arcs are omitted for clarity). Node  
581 size is scaled according to the degree, with food molecules highlighted in green. ‘Acceptor’  
582 and ‘Reduced Acceptor’ are abstract redox molecules as represented in KEGG metabolism.  
583 **Table S1. Metabolic networks annotated with catalysis rules. (A)** Prokaryotic, O<sub>2</sub>-  
584 independent global metabolic network **(B)** subset network of *Moorella thermoacetica* **(C)**  
585 subset network of *Methanococcus maripaludis*.

586 **Table S2. Composition of Food Sets used in predictions of maxRAFs in different**  
587 **metabolic networks and resulting maxRAF sizes.**

588 **Table S3. Lists of reactions in all maxRAFs predicted for all networks in all food sets.**

589 **Table S4. Connectivity of metabolites in LUCA’s maxRAF.**

590 **Data S1. Input file with the global prokaryotic O<sub>2</sub>-independent network used to run the**  
591 **maxRAF algorithm.** Food set with all small molecules, abiotic carbon and organic cofactors.

592

593

## 594 **References**

595 Anderson, I., Djao, O.D.N., Misra, M., Chertkov, O., Nolan, M., Lucas, S., Lapidus, A., Del  
596 Rio, T.G., Tice, H., Cheng, J.-F., et al. (2010). Complete genome sequence of  
597 *Methanothermobacter ferrooxidans* strain (V24ST). *Stand Genomic Sci* 3, 315–324.

598 Argueta, E.A., Amoh, A.N., Kafle, P., and Schneider, T.L. (2015). Unusual non-enzymatic  
599 flavin catalysis enhances understanding of flavoenzymes. *FEBS Lett* 589, 880–884.

600 Ashkenasy, G., Jagasia, R., Yadav, M., and Ghadiri, M.R. (2004). Design of a directed  
601 molecular network. *Proc Natl Acad Sci USA* 101, 10872–10877.

602 Baross, J.A. (2018). The rocky road to biomolecules. *Nature* 564, 42–43.

603 Barrows, L.R., and Magee, P.N. (1982). Nonenzymatic methylation of DNA by S-

604 adenosylmethionine in vitro. *Carcinogenesis*. 3, 349-351.

605 Betanzos-Lara, S., Liu, Z., Habtemariam, A., Pizarro, A.M., Qamar, B., and Sadler, P.J.

606 (2012). Organometallic Ruthenium and Iridium Transfer-Hydrogenation Catalysts Using

607 Coenzyme NADH as a Cofactor. *Angew Chemie Int Ed* 51, 3897–3900.

608 Betts, H.C., Puttick, M.N., Clark, J.W., Williams, T.A., Donoghue, P.C.J., and Pisani, D.

609 (2018). Integrated genomic and fossil evidence illuminates life’s early evolution and

610 eukaryote origin. *Nat Ecol Evol* 2, 1556–1562.

611 Dyson, F.J. (1982). A model for the origin of life. *J Mol Evol* 18, 344–350.

612 Ebenhöf, O., Handorf, T., and Heinrich, R. (2004). Structural analysis of expanding

613 metabolic networks. *Genome Inform* 15, 35–45.

614 Eigen, M., and Schuster, P. (1977). The Hypercycle: Part A. *Naturwissenschaften* 64, 541–

615 565.

616 Fischer, W.W., Hemp, J., and Johnson, J.E. (2016). Evolution of oxygenic photosynthesis.

617 *Annu Rev Earth Planet Sci* 44, 647–683.

618 Fuchs, G. (2011). Alternative pathways of carbon dioxide fixation: insights into the early

619 evolution of life? *Annu Rev Microbiol* 65, 631–658.

620 Goldford, J.E., Hartman, H., Smith, T.F., and Segrè, D. (2017). Remnants of an ancient

621 metabolism without phosphate. *Cell* 168, 1126-1134.e9.

622 Guengerich, F.P. (2016). Metals in biology 2016: Molecular basis of selection of metals by

623 enzymes. *J Biol Chem* 291, 20838–20839.

624 Herrmann, G., Jayamani, E., Mai, G., and Buckel, W. (2008). Energy Conservation via

625 Electron-Transferring Flavoprotein in Anaerobic Bacteria. *J Bacteriol* 190, 784–791.

626 Hess, V., Poehlein, A., Weghoff, M., Daniel, R., and Müller, V. (2014). A genome-guided

627 analysis of energy conservation in the thermophilic, cytochrome-free acetogenic bacterium

628 *Thermoanaerobacter kivui*. *BMC Genomics* 15, 1139.

- 629 Hordijk, W., and Steel, M. (2004). Detecting autocatalytic, self-sustaining sets in chemical  
630 reaction systems. *J Theor Biol* 227, 451–461.
- 631 Hordijk, W., Hein, J., and Steel, M. (2010). Autocatalytic Sets and the Origin of Life. *Entropy*  
632 12, 1733–1742.
- 633 Ijiri, A., Inagaki, F., Kubo, Y., Adhikari, R.R., Hattori, S., Hoshino, T., Imachi, H.,  
634 Kawagucci, S., Morono, Y., Ohtomo, Y., et al. (2018). Deep-biosphere methane production  
635 stimulated by geofluids in the Nankai accretionary complex. *Sci Adv* 4, eaao4631.
- 636 Islam, M.A., Zengler, K., Edwards, E.A., Mahadevan, R., and Stephanopoulos, G. (2015).  
637 Investigating *Moorella thermoacetica* metabolism with a genome-scale constraint-based  
638 metabolic model. *Integr Biol* 7, 869–882.
- 639 Kanehisa, M., Furumichi, M., Tanabe, M., Sato, Y., and Morishima, K. (2017). KEGG: New  
640 perspectives on genomes, pathways, diseases and drugs. *Nucleic Acids Res* 45, D353–D361.
- 641 Kauffman, S.A. (1971). Cellular homeostasis, epigenesis and replication in randomly  
642 aggregated macromolecular systems. *J Cybern* 1, 71–96.
- 643 Kauffman, S.A. (1986). Autocatalytic sets of proteins. *J Theor Biol* 119, 1–24.
- 644 Kauffman, S.A. (2011). Approaches to the Origin of Life on Earth. *Life* 1, 34–48.
- 645 Lang, S.Q., Butterfield, D.A., Schulte, M., Kelley, D.S., and Lilley, M.D. (2010). Elevated  
646 concentrations of formate, acetate and dissolved organic carbon found at the Lost City  
647 hydrothermal field. *Geochim Cosmochim Acta* 74, 941–952.
- 648 Martin, W.F. (2019) Carbon metal bonds, rare and primordial in metabolism *Trends Biochem*  
649 *Sci* in press. <https://doi.org/10.1016/j.tibs.2019.04.010>
- 650 Martin, W., and Russell, M.J. (2007). On the origin of biochemistry at an alkaline  
651 hydrothermal vent. *Philos Trans R Soc B Biol Sci* 362, 1887–1926.
- 652 Martínez-Cano, D.J., Reyes-Prieto, M., Martínez-Romero, E., Partida-Martínez, L.P., Latorre,  
653 A., Moya, A., and Delaye, L. (2015). Evolution of small prokaryotic genomes. *Front*  
654 *Microbiol* 5, 742.

- 655 McCollom, T.M., and Seewald, J.S. (2007). Abiotic synthesis of organic compounds in deep-  
656 sea hydrothermal environments. *Chem Rev* 107, 382–401.
- 657 McDermott, J.M., Seewald, J.S., German, C.R., and Sylva, S.P. (2015). Pathways for abiotic  
658 organic synthesis at submarine hydrothermal fields. *Proc Natl Acad Sci U S A* 112, 7668–  
659 7672.
- 660 Morowitz, H.J., Kostelnik, J.D., Yang, J., and Cody, G.D. (2000). The origin of intermediary  
661 metabolism. *Proc Natl Acad Sci* 97, 7704–7708.
- 662 Mossel, E., and Steel, M. (2005). Random biochemical networks: the probability of self-  
663 sustaining autocatalysis. *J Theor Biol* 233, 327–336.
- 664 Muchowska, K.B., Varma, S.J., and Moran, J. (2019). Synthesis and breakdown of universal  
665 metabolic precursors promoted by iron. *Nature* 569 104–107.
- 666 Müller, V., Chowdhury, N.P., and Basen, M. (2018). Electron bifurcation: A long-hidden  
667 energy-coupling mechanism. *Annu Rev Microbiol* 72, 331–353.
- 668 Orgel, L.E. (2008). The implausibility of metabolic cycles on the prebiotic Earth. *PLoS Biol*  
669 6, e18.
- 670 Patel, B.H., Percivalle, C., Ritson, D.J., Duffy, C.D., and Sutherland, J.D. (2015). Common  
671 origins of RNA, protein and lipid precursors in a cyanosulfidic protometabolism. *Nat Chem* 7,  
672 301–307.
- 673 Raymond, J., and Segrè, D. (2006). The effect of oxygen on biochemical networks and the  
674 evolution of complex life. *Science* 311, 1764–1767.
- 675 Ribeiro, A.J.M., Holliday, G.L., Furnham, N., Tyzack, J.D., Ferris, K., and Thornton, J.M.  
676 (2018). Mechanism and Catalytic Site Atlas (M-CSA): a database of enzyme reaction  
677 mechanisms and active sites. *Nucleic Acids Res* 46, D618–D623.
- 678 Richards, M.A., Lie, T.J., Zhang, J., Ragsdale, S.W., Leigh, J.A., and Price, N.D. (2016).  
679 Exploring hydrogenotrophic methanogenesis: A genome scale metabolic reconstruction of  
680 *Methanococcus maripaludis*. *J Bacteriol* 198, 3379–3390.

- 681 Schönheit, P., Buckel, W., and Martin, W.F. (2016). On the origin of heterotrophy. Trends  
682 Microbiol 24, 12–25.
- 683 Semenov, S.N., Kraft, L.J., Ainla, A., Zhao, M., Baghbanzadeh, M., Campbell, V.E., Kang,  
684 K., Fox, J.M., and Whitesides, G.M. (2016). Autocatalytic, bistable, oscillatory networks of  
685 biologically relevant organic reactions. Nature 537, 656–660.
- 686 Shannon, P. (2003). Cytoscape: A software environment for integrated models of  
687 biomolecular interaction networks. Genome Res 13, 2498–2504.
- 688 Smith, E., and Morowitz, H.J. (2004). Universality in intermediary metabolism. Proc Natl  
689 Acad Sci 101, 13168–13173.
- 690 Sousa, F.L., Hordijk, W., Steel, M., and Martin, W.F. (2015). Autocatalytic sets in *E. coli*  
691 metabolism. J Syst Chem 6, 4.
- 692 Stockbridge, R.B., Lewis, C.A., Yuan, Y., and Wolfenden, R. (2010). Impact of temperature  
693 on the time required for the establishment of primordial biochemistry, and for the evolution of  
694 enzymes. Proc Natl Acad Sci 107, 1–4.
- 695 Stupperich, E., and Fuchs, G. (1984). Autotrophic synthesis of activated acetic acid from two  
696 CO<sub>2</sub> in *Methanobacterium thermoautotrophicum*. Arch Microbiol 139, 8–13.
- 697 Tashiro, T., Ishida, A., Hori, M., Igisu, M., Koike, M., Méjean, P., Takahata, N., Sano, Y.,  
698 and Komiya, T. (2017). Early trace of life from 3.95 Ga sedimentary rocks in Labrador,  
699 Canada. Nature 549, 516–518.
- 700 The UniProt Consortium. (2018). UniProt: the universal protein knowledgebase. Nucleic  
701 Acids Res 46, 2699.
- 702 Vaidya, N., Manapat, M.L., Chen, I.A., Xulvi-Brunet, R., Hayden, E.J., and Lehman, N.  
703 (2012). Spontaneous network formation among cooperative RNA replicators. Nature 491, 72–  
704 77.
- 705 Varma, S.J., Muchowska, K.B., Chatelain, P., and Moran, J. (2018). Native iron reduces CO<sub>2</sub>  
706 to intermediates and end-products of the acetyl-CoA pathway. Nat Ecol Evol 2, 1019–1024.



- 707 Weiss, M.C., Sousa, F.L., Mrnjavac, N., Neukirchen, S., Roettger, M., Nelson-Sathi, S., and  
708 Martin, W.F. (2016). The physiology and habitat of the last universal common ancestor. *Nat*  
709 *Microbiol* *1*, 16116.
- 710 White, H.B. (1976). Coenzymes as fossils of an earlier metabolic state. *J Mol Evol* *7*, 101–  
711 104.
- 712 Zabinski, R.F., and Toney, M.D. (2001). Metal Ion Inhibition of Nonenzymatic Pyridoxal  
713 Phosphate Catalyzed Decarboxylation and Transamination. *J Am Chem Soc* *123*, 193–198.
